# Supplementary material for: Modification of the carbide microstructure by N- and S-functionalization of the support in MoxC/CNT catalysts
Source: Royal Society of Chemistry journal article supplement (doi:10.1039/c5cy01480h), 2015-12-15
Supplement: c5cy01480h1.pdf [file c5cy01480h1.pdf]

## Electronic Supplementary Information

### **Modification of the carbide microstructure by N- and S-functionalization of the support in Mo<sub>x</sub>C/CNT catalysts**

Benjamin Frank,<sup>†a</sup> Zai-Lai Xie,<sup>‡a</sup> Klaus Friedel,<sup>§a</sup> Michael Scherzer,<sup>a</sup> Robert Schlögl,<sup>a</sup>  
and Annette Trunschke<sup>\*a</sup>

*Department of Inorganic Chemistry, Fritz-Haber-Institut der Max-Planck-Gesellschaft,  
Faradayweg 4-6, D-14195 Berlin, Germany*

\*Fax: (+) 49 30 8413 4405, E-mail: [trunschke@fhi-berlin.mpg.de](mailto:trunschke@fhi-berlin.mpg.de)

#### Present Addresses

<sup>†</sup>B.F.: *UniCat BASF Joint Lab (BasCat), Hardenbergstraße 36, 10623 Berlin, Germany.*

<sup>‡</sup>Z.-L.X.: *State Key Laboratory of Photocatalysis on Energy and Environment, College of Chemistry, Fuzhou University, Fuzhou 35002, P. R. China.*

<sup>§</sup>K.F.: *Faculty of Chemistry and CENIDE, Universität Duisburg-Essen, Universitätsstrasse 5-7, 45141 Essen, Germany.*

#### Sample information

The catalysts have the following identification numbers (required to clearly identify the batch of reproductions in catalyst synthesis):

|                                         |                 |
|-----------------------------------------|-----------------|
| MoC/oCNT                                | 13898 and 13899 |
| MoC/O <sub>2</sub> -oCNT                | 14169           |
| MoC/H <sub>2</sub> O <sub>2</sub> -oCNT | 14170           |
| MoC/HNO <sub>3</sub> -CNT               | 16193           |
| MoC/oCNT(ref)                           | 16194           |
| MoC/oN-CNT                              | 14172           |
| MoC/S-oCNT                              | 16195           |
| MoC/oNG                                 | 14173           |
| MoC/oAC                                 | 14174           |

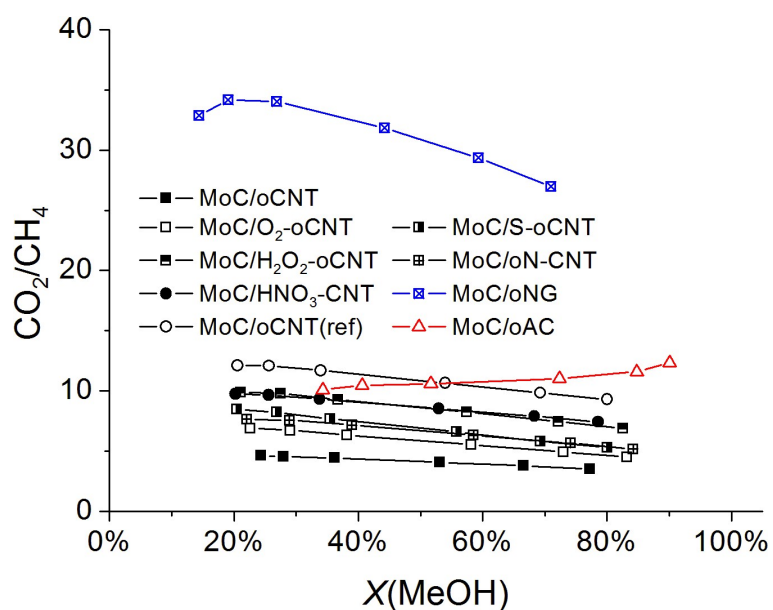

**Fig. S1** CO<sub>2</sub>/CH<sub>4</sub> product ratio as a function of MeOH conversion. Reaction conditions: 250 mg catalyst, 10-100 ml min<sup>-1</sup> of 1% MeOH/1%H<sub>2</sub>O/He, 250°C.

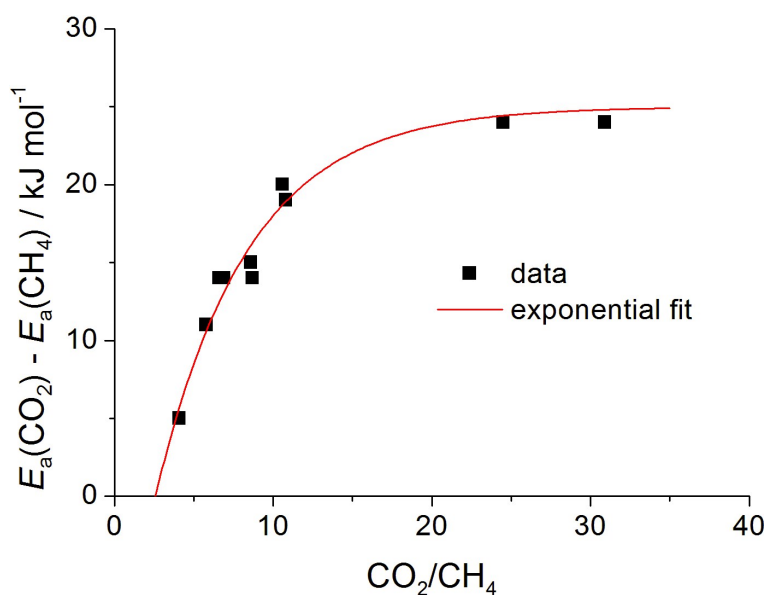

**Fig. S2** Dependency of CO<sub>2</sub>/CH<sub>4</sub> product ratio at 50% MeOH conversion on the difference of apparent activation energies of their formation.

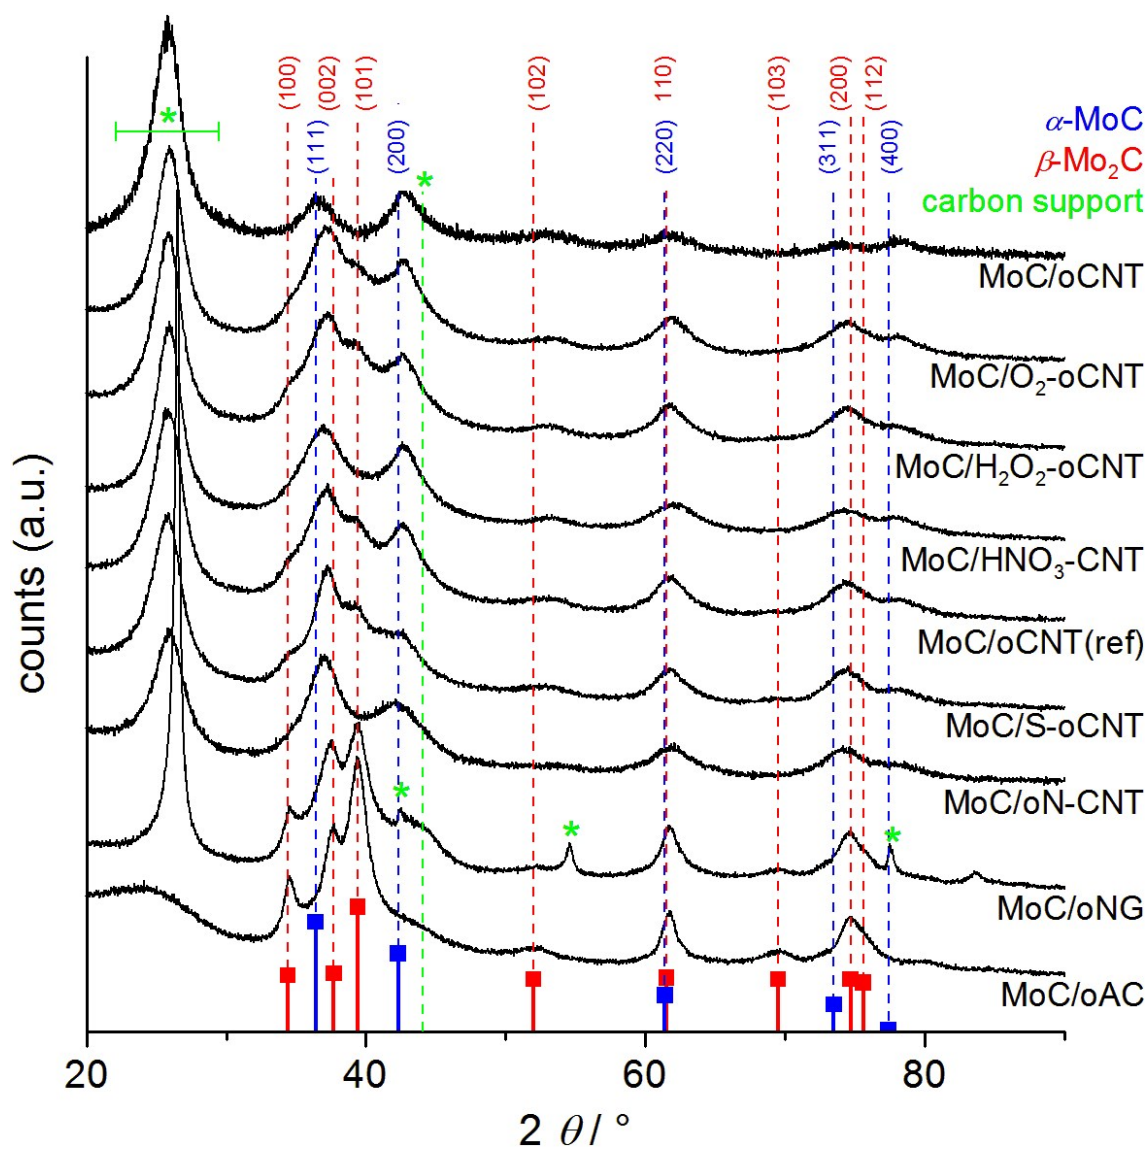

**Fig. S3** Full XRD patterns of carbon supported MoC catalysts.

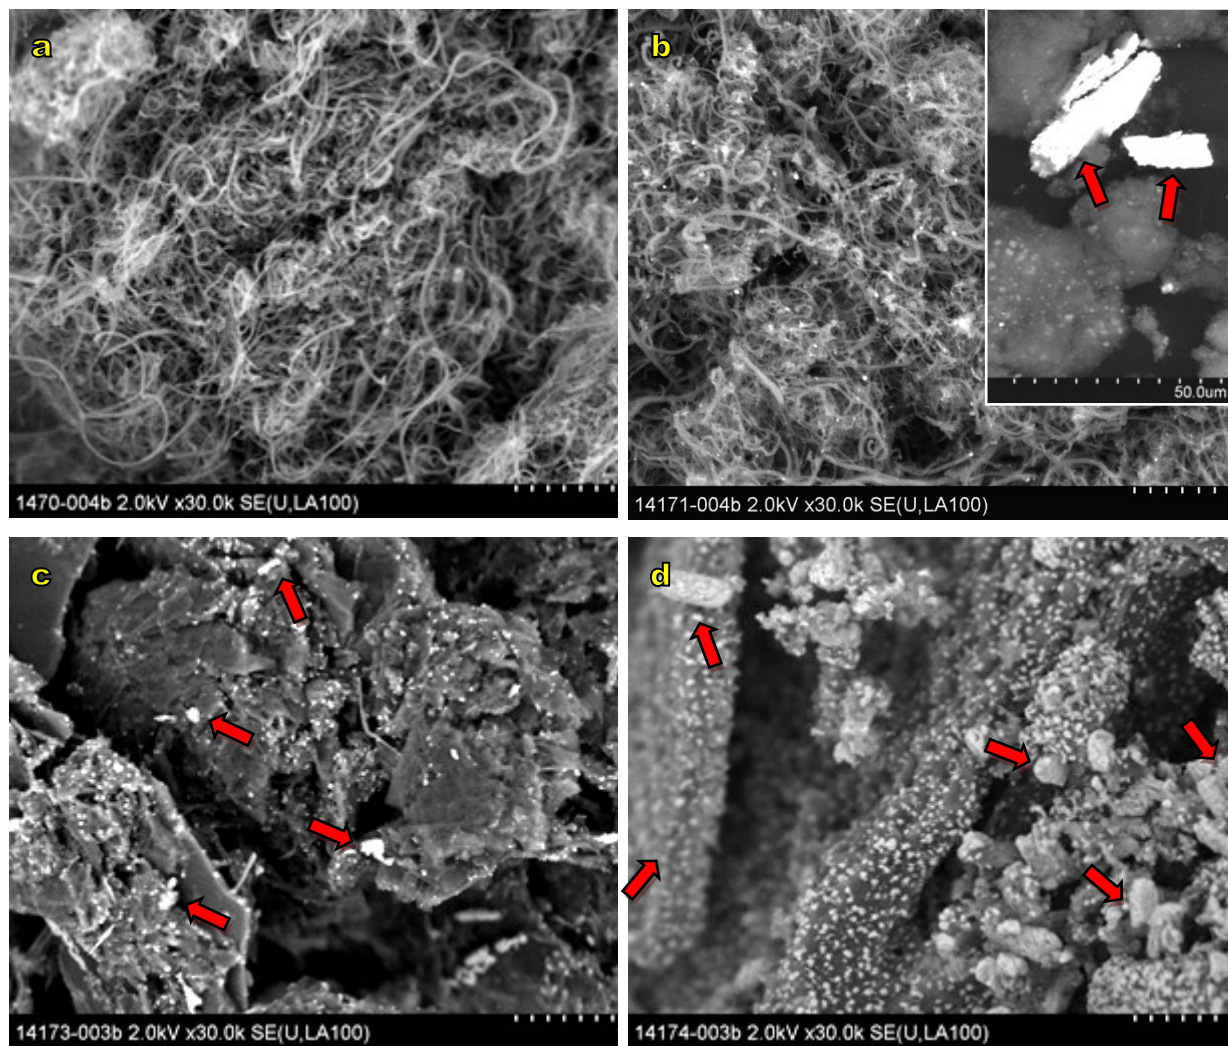

**Fig. S4** SEM micrographs (BSE mode) of carbon supported  $\text{Mo}_x\text{C}$  catalysts. The active phase is supported on (a) oxidized CNTs, (b) N-doped CNTs, (c) oxidized graphite, and (d) oxidized activated carbon. The inset in (b) shows a large MoC particle in MoC/N-CNT. Red arrows point at larger  $\text{Mo}_x\text{C}$  particles.

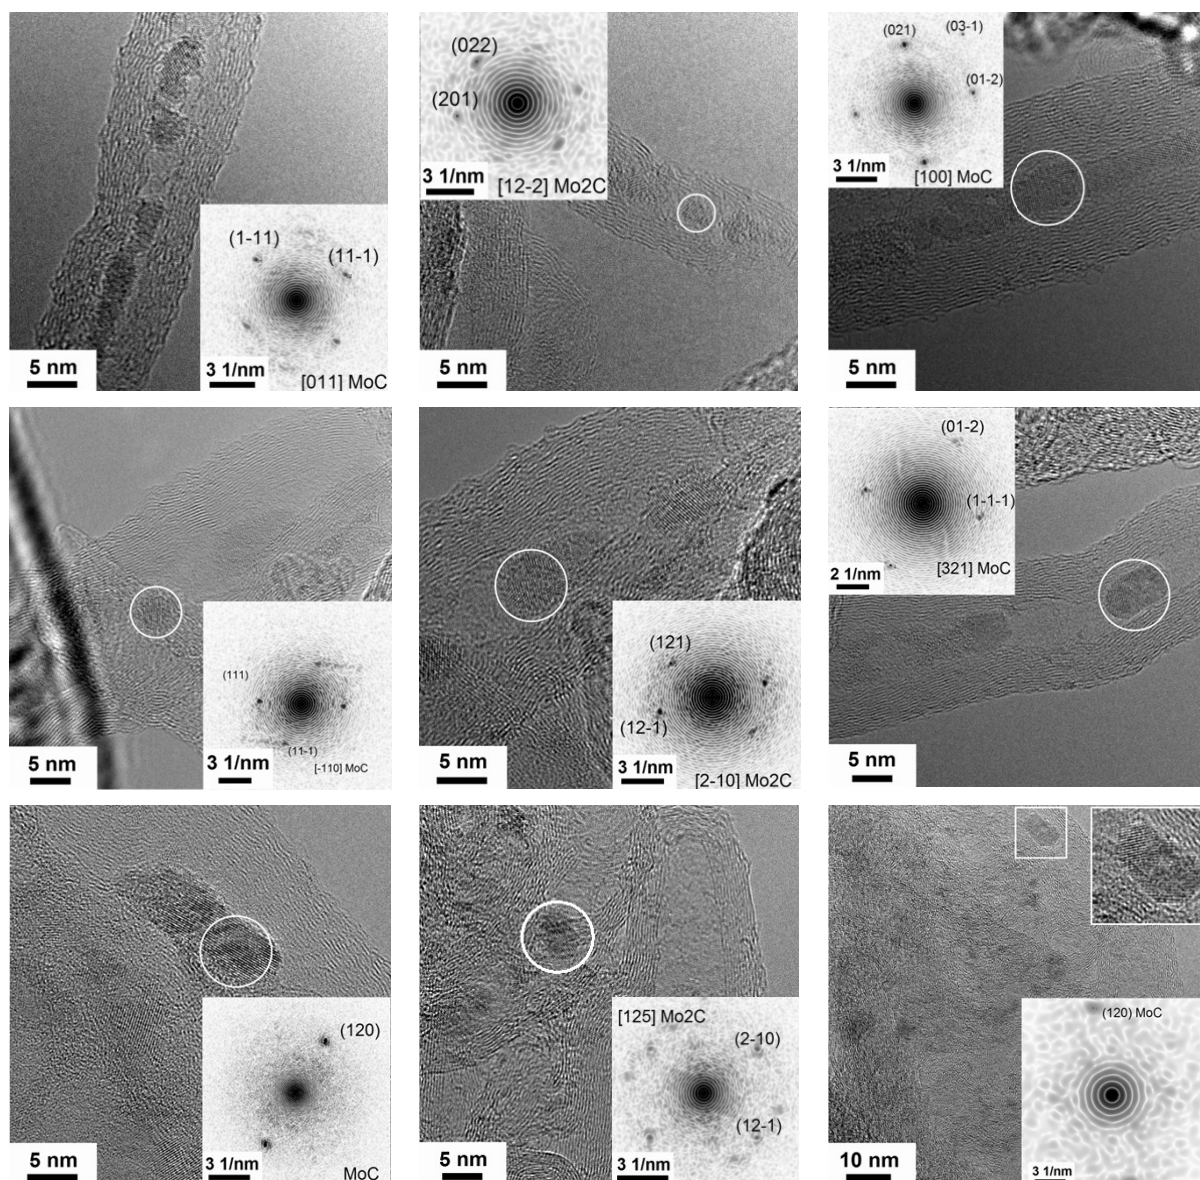

**Fig. S5** HRTEM analysis of lattice spacings within MoC/O<sub>2</sub>-CNT (top), MoC/oN-CNT (middle), and MoC/S-CNT (bottom).

**Table S1** Evaluation of lattice spacings in Fig. S6

| Sample              | Reflex | Phase                      | $d_{\text{theor.}} / \text{\AA}$ | $d_{\text{exp.}} / \text{\AA}$ | $\Delta / \%$ |       |
|---------------------|--------|----------------------------|----------------------------------|--------------------------------|---------------|-------|
| O <sub>2</sub> -CNT | (111)  | $\alpha$ -MoC              | 2.47                             | 2.486                          | +0.6          |       |
|                     | (111)  | $\alpha$ -MoC              | 2.47                             | 2.559                          | +3.5          |       |
|                     | (022)  | $\beta$ -Mo <sub>2</sub> C | 1.97                             | 1.96                           | -0.5          |       |
|                     | (201)  | $\beta$ -Mo <sub>2</sub> C | 2.15                             | 2.12                           | -1.4          |       |
|                     | (012)  | $\alpha$ -MoC              | 1.91                             | 1.93                           | +1.0          |       |
|                     | (021)  | $\alpha$ -MoC              | 1.91                             | 1.914                          | +0.2          |       |
|                     | (031)  | $\alpha$ -MoC              | 1.35                             | 1.35                           | $\pm 0.0$     |       |
|                     | oN-CNT | (111)                      | $\alpha$ -MoC                    | 2.47                           | 2.692         | +9.0  |
|                     |        | (111)                      | $\alpha$ -MoC                    | 2.47                           | 2.766         | +12.0 |
|                     |        | (121)                      | $\beta$ -Mo <sub>2</sub> C       | 2.68                           | 2.602         | -2.9  |
| (121)               |        | $\beta$ -Mo <sub>2</sub> C | 2.68                             | 2.634                          | -1.7          |       |
| (111)               |        | $\alpha$ -MoC              | 2.47                             | 2.45                           | -0.8          |       |
| (012)               |        | $\alpha$ -MoC              | 1.91                             | 2.07                           | +8.5          |       |
| S-CNT               |        | (120)                      | $\alpha$ -MoC                    | 1.91                           | 1.917         | +0.3  |
|                     | (200)  | $\alpha$ -MoC              | 2.14                             | 1.917                          | -10.4         |       |
|                     | (210)  | $\beta$ -Mo <sub>2</sub> C | 2.20                             | 2.313                          | +5.1          |       |
|                     | (121)  | $\beta$ -Mo <sub>2</sub> C | 2.29                             | 2.29                           | $\pm 0.0$     |       |
|                     | (120)  | $\alpha$ -MoC              | 1.91                             | 1.99                           | +4.1          |       |
|                     | (200)  | $\alpha$ -MoC              | 2.14                             | 1.99                           | -6.9          |       |
